# Supplementary material for: A Contrast-Enhanced CT-Based Deep Learning System for Preoperative Prediction of Colorectal Cancer Staging and RAS Mutation
Source: MDPI journal article supplement (doi:10.3390/cancers15184497), 2023-09-10
Supplement: s1 [file s1]

## **Supplementary materials**

### **RAS mutation analysis**

DNA was extracted from formalin-fixed paraffin-embedded (FFPE) tumour sections using the QIAamp DNA FFPE Tissue Kit (Qiagen). Mutations of KRAS (exons 2, 3, and 4), NRAS (exons 2, 3, and 4), and BRAF (V600E) were analysed by a next-generation sequencing (NGS) method.
